# Supplementary material
Source: PubMed Central journal article supplement (PMC3281713)

## **Supplemental Information**

### **Supplemental Figure 1 ATG16L1 does not regulate LPS or TNF- $\alpha$ signaling.**

WT or ATG16L1-deficient MEF were stimulated with LPS (100 ng/ml) or TNF- $\alpha$  (1 ng/ml) as indicated and activation of pERK by IB and NF- $\kappa$ B by EMSA was measured.

# Supplemental Figure 1

**A**

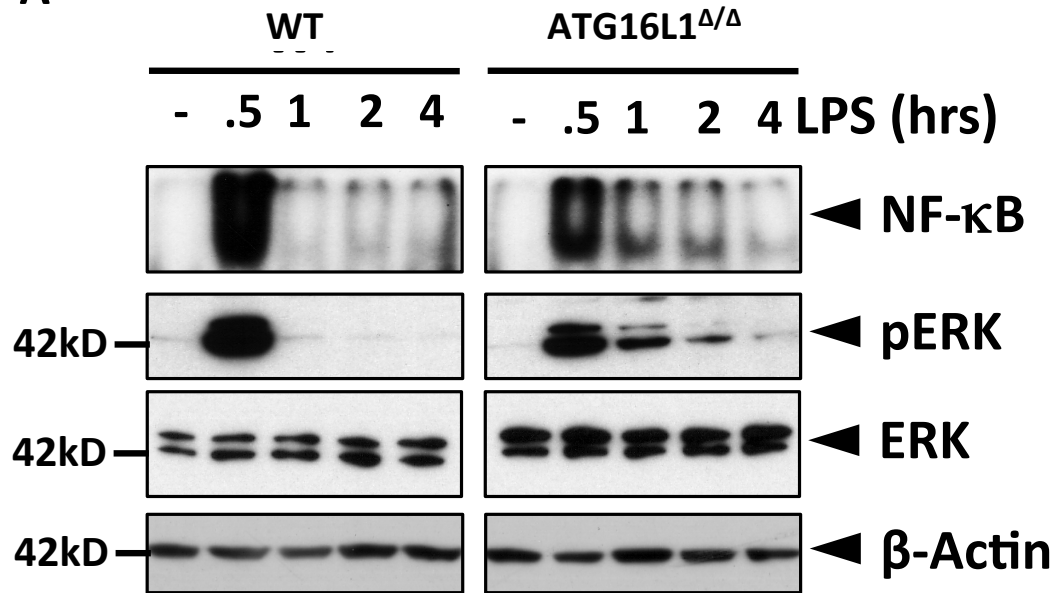

**B**

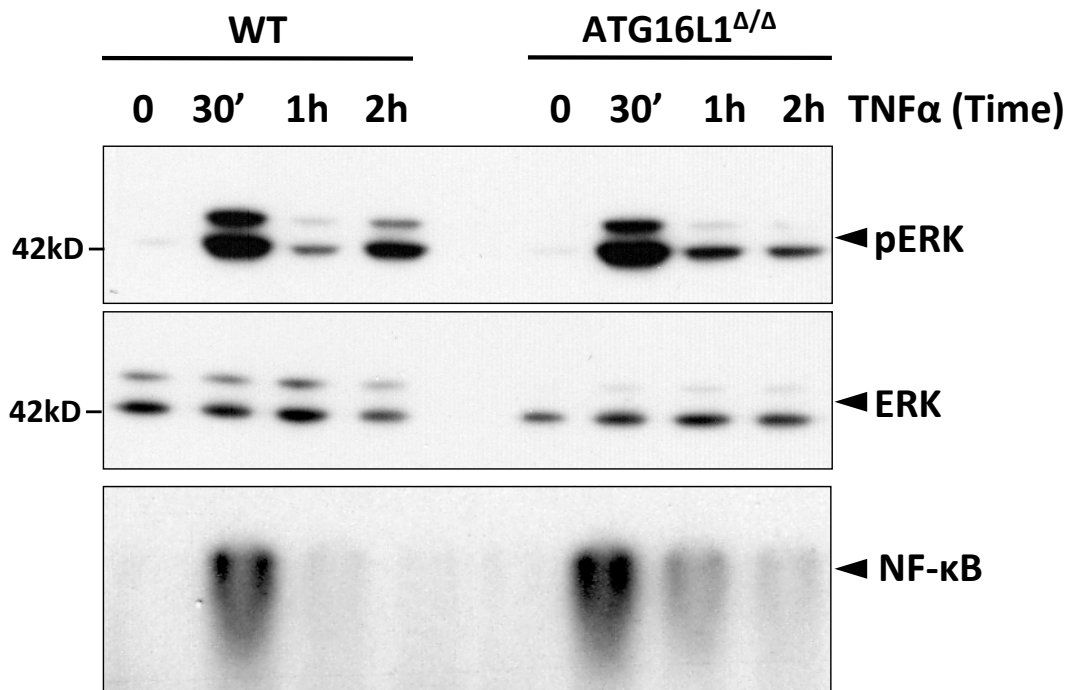

**Supplemental Figure 2 ATG16L1 does not regulate p62 at the mRNA level.**

**A.** The levels of p62 mRNA in WT or ATG16L1-deficient MEF were measured by qPCR. **B.** GFP-p62 accumulates upon proteasome inhibition. WT or ATG16L1-deficient ( $\Delta/\Delta$ ) MEF were transfected with GFP-p62 and treated with MG132 (10  $\mu$ M) for 4 hrs and the levels of the indicated proteins were measured by immunoblotting.

# Supplemental Figure 2

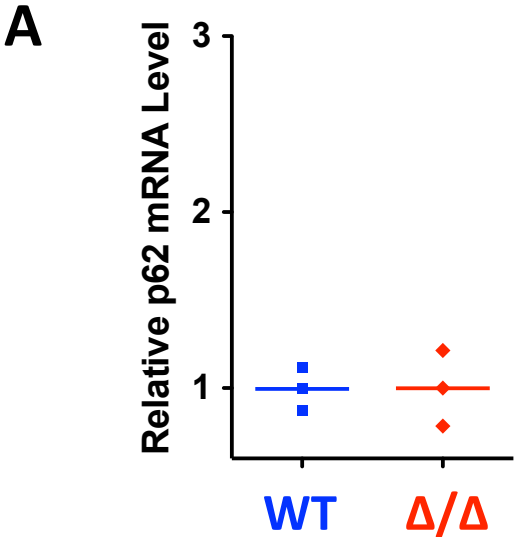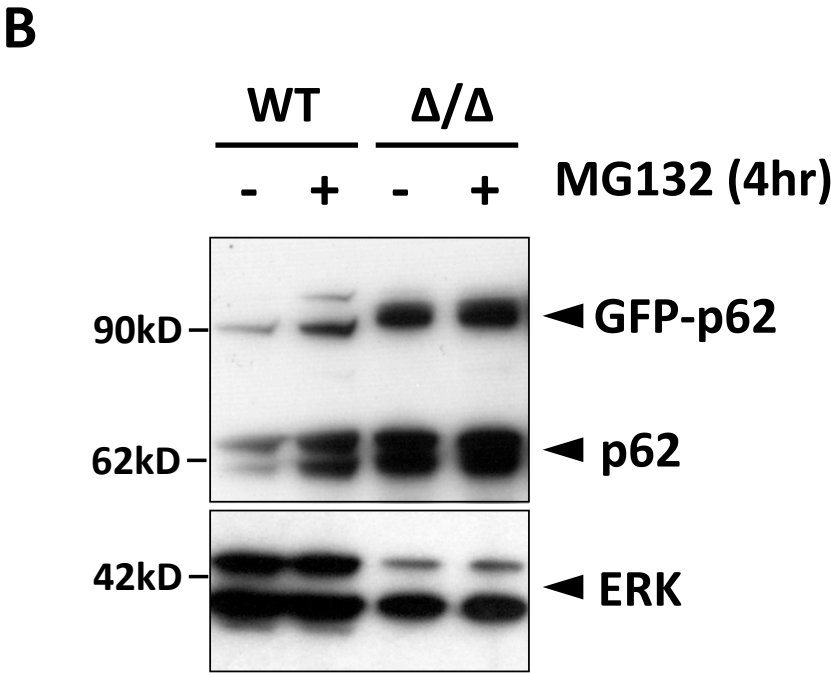

**Supplemental Figure 3. P62 enhances IL-1 $\beta$  signaling in MEF. A.** WT MEF were transfected with either control or p62 siRNA and stimulated with IL-1 $\beta$  as indicated. The levels of the indicated proteins after IL-1 $\beta$  stimulation (1 ng/ml) were determined by IB. **B.** WT MEF were transfected with either GFP or GFP-p62 expression vector and stimulated with IL-1 $\beta$  as indicated. The levels of the indicated proteins after IL-1 $\beta$  stimulation (1 ng/ml) were determined by IB.

### Supplemental Figure 3

**A**

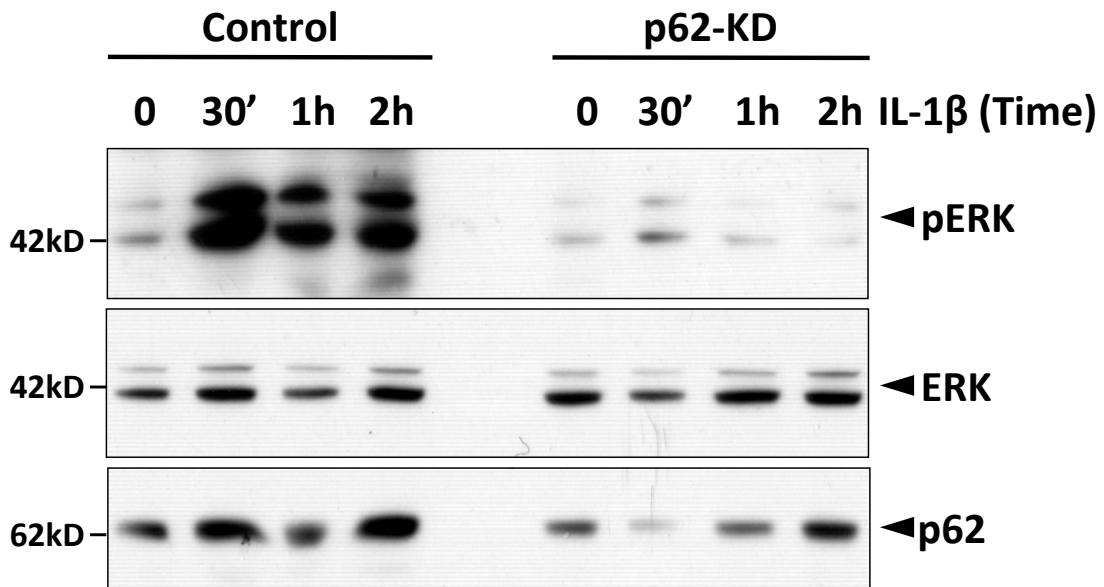

**B**

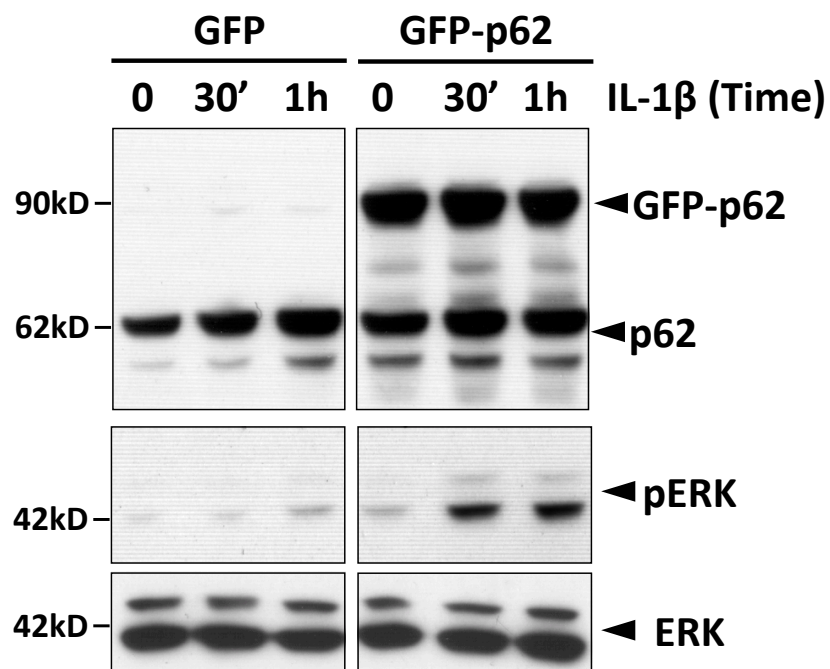

**Supplemental Figure 4. ATG16L1 or IL-1 $\beta$  does not regulate expression of Cul-3 in MEF.** **A.** WT ATG16L1-deficient MEF were stimulated with IL-1 $\beta$  (1 ng/ml) as indicated and the levels of the indicated proteins were measured by IB. **B.** WT MEF were transfected with either GFP-p62 or V5-Cul-3 and expression of these proteins was confirmed by immunofluorescence.

## Supplemental Figure 4

**A**

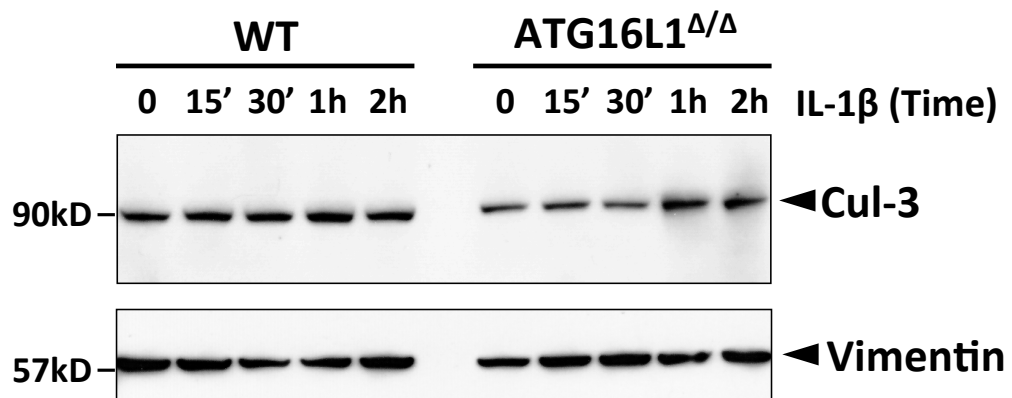

**B**

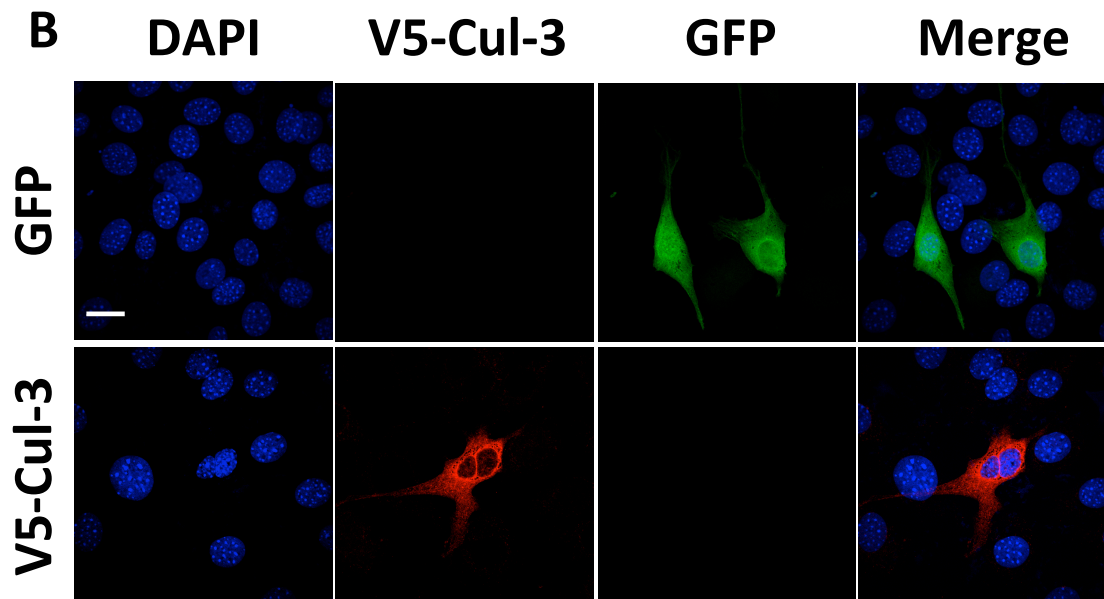



**Supplemental Figure 5. Regulation of p62 by Cul-3 is independent of Nrf2.**

**A.** Nrf2 knockdown does not significantly alter p62 degradation by proteasome. WT MEF were transfected with either control or Nrf2 siRNA (Santa Cruz Biotechnology) and treated with MG132 (10 $\mu$ M) as indicated. The levels of the indicated proteins were measured by immunoblotting. Nrf2 protein was not detectible under steady state conditions in MEF but accumulated upon proteasome inhibition. **B.** Nrf2 does not significantly influence p62 degradation by Cul-3. WT MEF were transfected with control, Cul-3, or Cul-3 plus Nrf2 siRNA and treated with MG132 (10 $\mu$ M) as indicated. The levels of the indicated proteins were measured by immunoblotting.

## Supplemental Figure 5

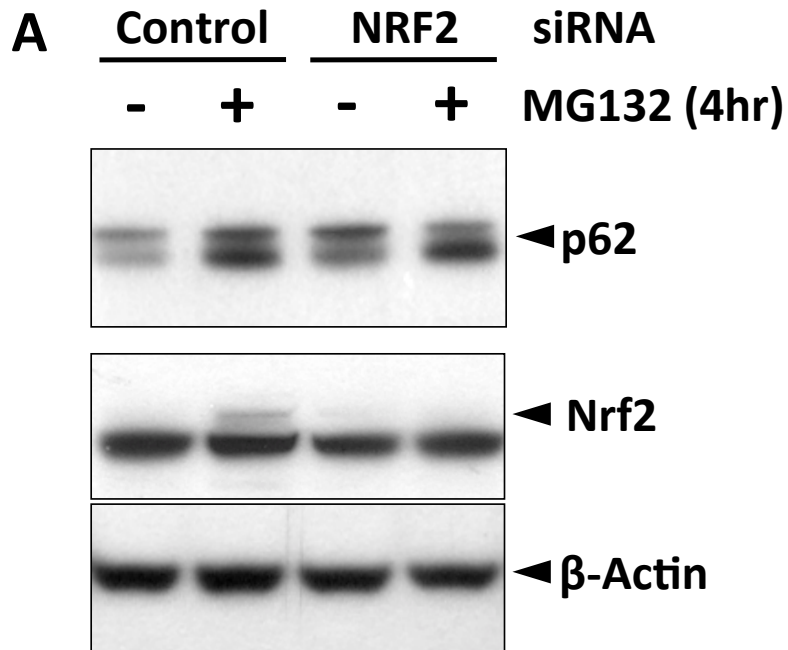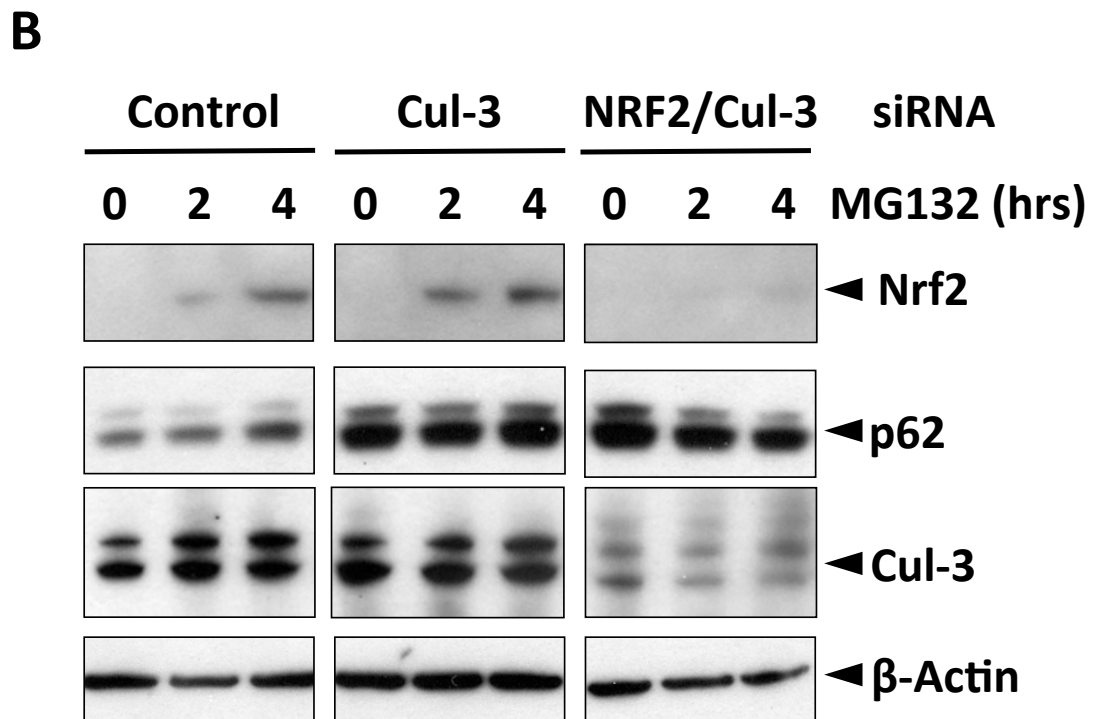

Supplement: supp_M111.280065_jbc.M111.280065-1.pdf [file supp_M111.280065_jbc.M111.280065-1.pdf]
